# Supplementary material for: Acupuncture for patients with type 2 diabetes mellitus with dry eye: protocol for a systematic review and meta-analysis
Source: HighWire-hosted journal article supplement (doi:10.1136/bmjopen-2021-057289), 2022-06-01
Supplement: bmjopen-2021-057289supp001_data_supplement.pdf [file bmjopen-2021-057289supp001_data_supplement.pdf]

### Figure 1. PRISMA 2020 Flow Diagram Template for Systematic Reviews

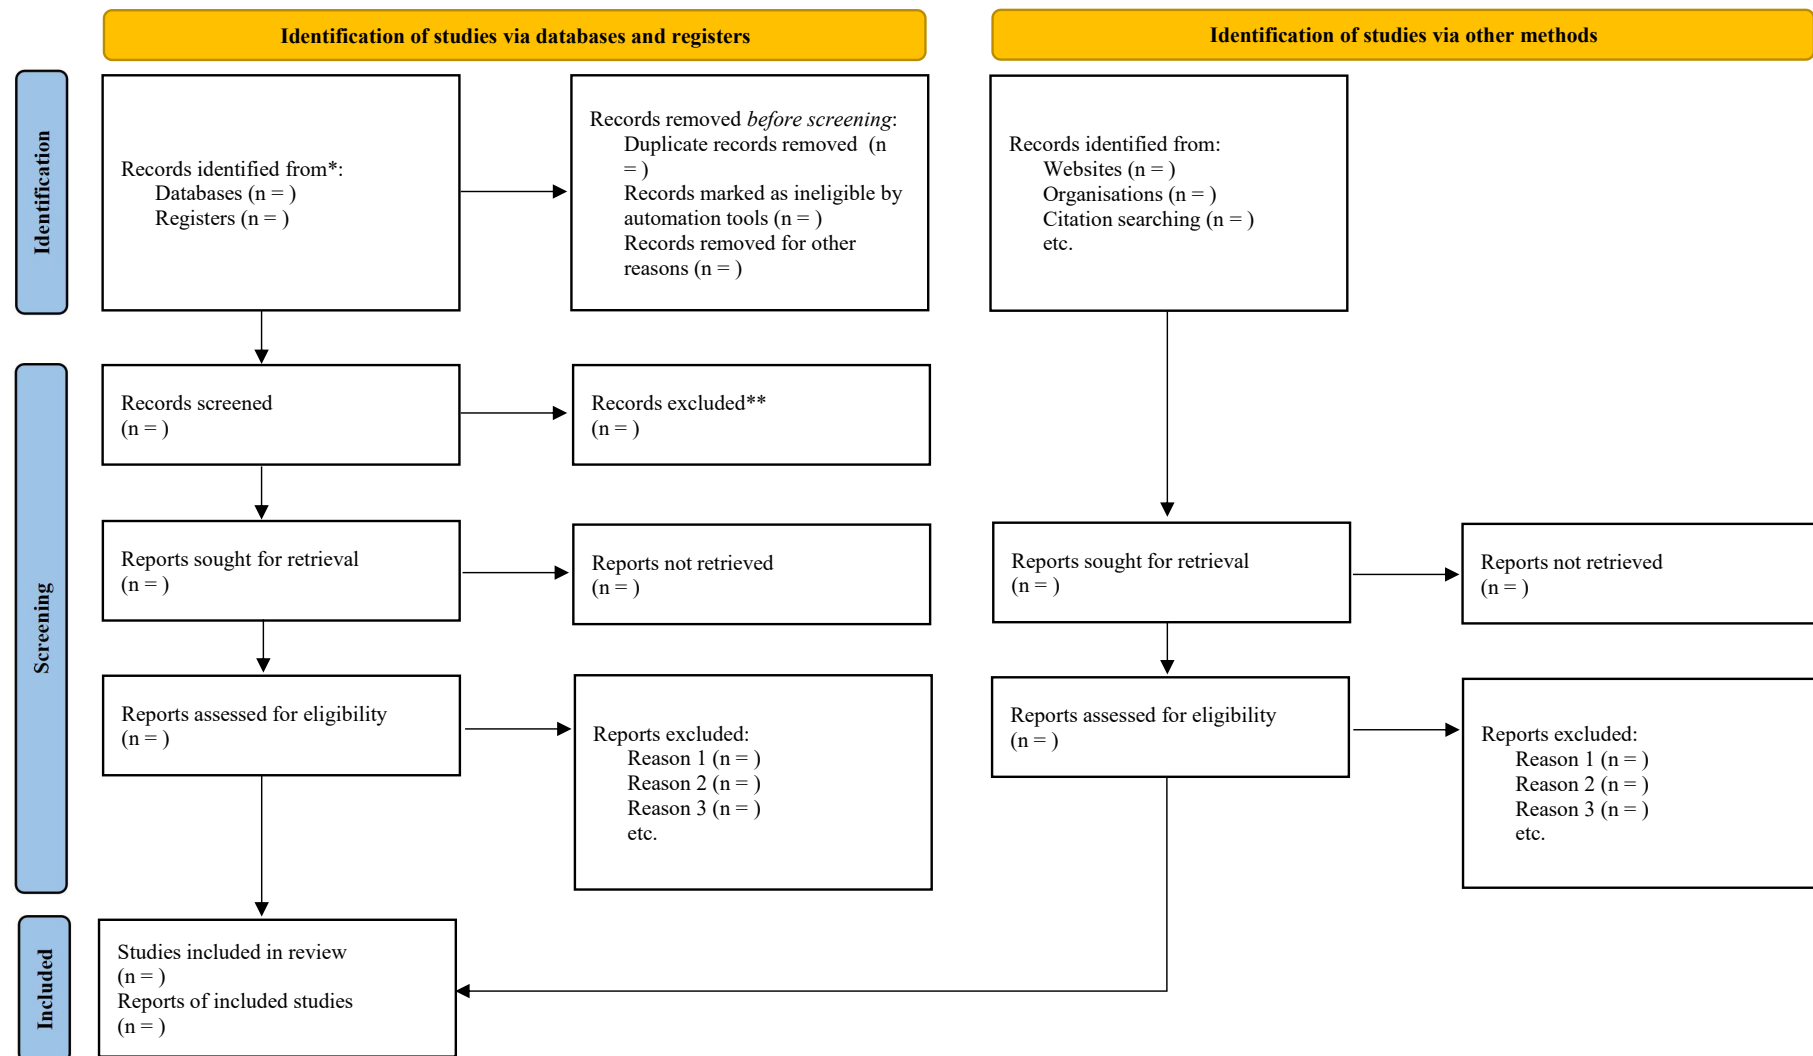

\*Consider, if feasible to do so, reporting the number of records identified from each database or register searched (rather than the total number across all databases/register).

\*\*If automation tools were used, indicate how many records were excluded by a human and how many were excluded by automation tools.

*From:* Page MJ, McKenzie JE, Bossuyt PM, Boutron I, Hoffmann TC, Mulrow CD, et al. The PRISMA 2020 statement: an updated guideline for reporting systematic reviews. *BMJ* 2021;372:n71. doi: 10.1136/bmj.n71. For more information, visit: <http://www.prisma-statement.org/>
